# Supplementary material
Source: publisher figshare collection journal article supplement (https://tandf.figshare.com/ndownloader/files/13637918)
Supplement: Supplementary file 1 [file 13637918]

**Supporting Information**

Spectroscopic, structural, electrochemical and cytotoxicity studies on dithiocarbamato-chelated ruthenium organometallics incorporating imine‑phenol function

MRINAL KANTI GHOSH, SUMAN MANDAL, SUDIP MOHAPATRA, ANNESHA CHATTERJEE, ARINDAM BHATTACHARYYA and SWARUP CHATTOPADHYAY*

**Contents**

**Fig. S1:** IR spectrum of **2**(Cl)(MeDTC).

**Fig. S2:** IR spectrum of **2**(Cl)(EtDTC).

**Fig. S3:** IR spectrum of **2**(Cl)(PyrDTC).

**Fig. S4:** IR spectrum of **2**(Me)(PyrDTC).

**Fig. S5:** IR spectrum of **2**(MeO)(PyrDTC).

**Fig. S6:** 1HNMR spectrum of **2**(Cl)(MeDTC).

**Fig. S7:** 1HNMR spectrum of **2**(Cl)(EtDTC).

**Fig. S8:** 1HNMR spectrum of **2**(Cl)(PyrDTC).

**Fig. S9:** 1HNMR spectrum of **2**(Me)(PyrDTC).

**Fig. S10:** 1HNMR spectrum of **2**(MeO)(PyrDTC).

**Fig. S11: 3**1PNMR spectrum of **2**(Cl)(MeDTC).

**Fig. S12: 3**1PNMR spectrum of **2**(Cl)(EtDTC).

**Fig. S13: 3**1PNMR spectrum of **2**(Cl)(PyrDTC).

**Fig. S14: 3**1PNMR spectrum of **2**(Me)(PyrDTC).

**Fig. S15: 3**1PNMR spectrum of **2**(MeO)(PyrDTC).

**Fig. S16: 13**CNMR spectrum of **2**(Cl)(MeDTC).

**Fig. S17: 13**CNMR spectrum of **2**(Cl)(EtDTC).

**Fig. S18: 13**CNMR spectrum of **2**(Cl)(PyrDTC).

**Fig. S19: 13**CNMR spectrum of **2**(Me)(PyrDTC).

**Fig. S20: 13**CNMR spectrum of **2**(MeO)(PyrDTC).

**Fig. S21:** Isodensity plot of frontier molecular orbitals of **2**(Cl)(MeDTC)with isodensity value

0.04.

**Fig. S22:** Isodensity plot of frontier molecular orbitals of **2**(Cl)(PyrDTC)with isodensity value

0.04.

**Fig. S23:** Isodensity plot of frontier molecular orbitals of **2**(Me)(PyrDTC)with isodensity

value 0.04.

**Fig. S24:** Isodensity plot of frontier molecular orbitals of **2**(MeO)(PyrDTC)with isodensity

value 0.04.

**Fig. S25:** Experimental and TD-DFT calculated UV-vis absorption spectra of **2**(Cl)(MeDTC).

**Fig. S26:** Optimized structure of the oxidized species [**2**(Cl)(MeDTC)]+.

**Fig. S27:** HOMO-LUMO diagram of the oxidized species [**2**(Cl)(MeDTC)]+.

**Table S1:** Frontier molecular orbital composition (%) in the ground state for **2**(Cl)(MeDTC).

**Table S2:** Frontier molecular orbital composition (%) in the ground state for **2**(Cl)(PyrDTC).

**Table S3:** Frontier molecular orbital composition (%) in the ground state for **2**(Me)(PyrDTC).

**Table S4:** Frontier molecular orbital composition (%) in the ground state for **2**(MeO)(PyrDTC).

**Table S5:** Cartesian coordinates (Å) for DFT energy-minimized model of **2**(Cl)(MeDTC).

**Table S6:** Cartesian coordinates (Å) for DFT energy-minimized model of **2**(Cl)(EtDTC).

**Table S7:** Cartesian coordinates (Å) for DFT energy-minimized model of **2**(Cl)(PyrDTC).

**Table S8:** Cartesian coordinates (Å) for DFT energy-minimized model of **2**(Me)(PyrDTC).

**Table S9:** Cartesian coordinates (Å) for DFT energy-minimized model of **2**(MeO)(PyrDTC).

**Table S10:** Cartesian coordinates (Å) for DFT energy-minimized model of [**2**(Cl)(MeDTC)]+.

**Table S11:** Comparison of the crystal data of molecule A and B with the DFT optimized

parameters.


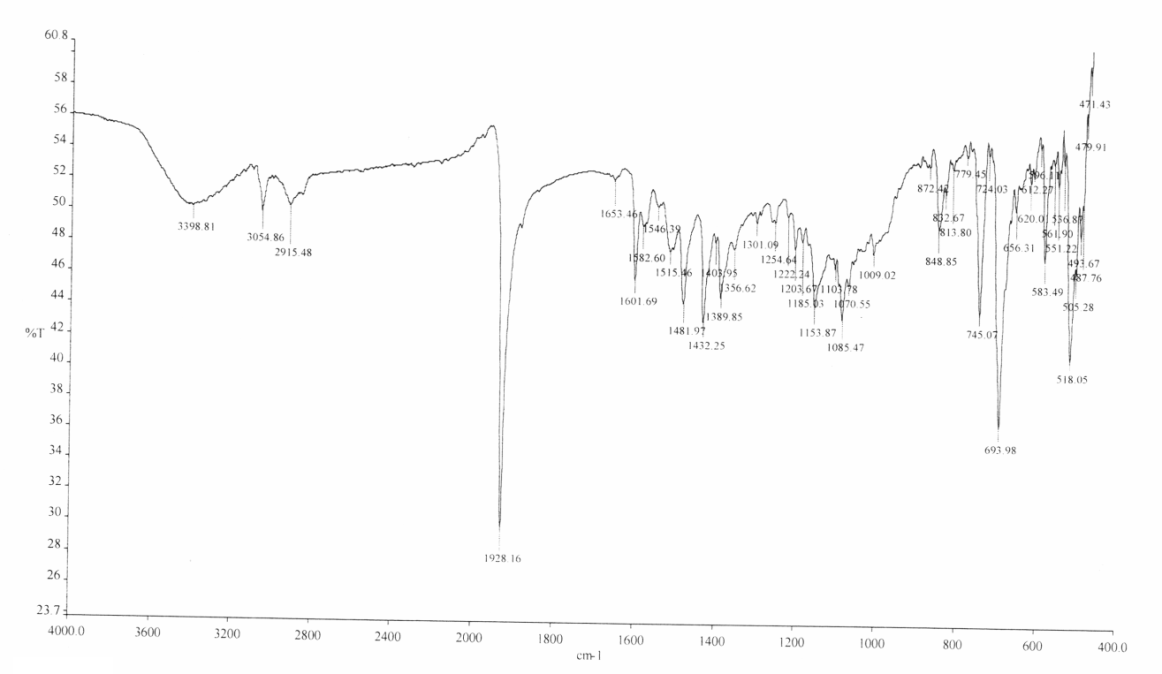


**Fig. S1:** IR spectrum of **2**(Cl)(MeDTC).


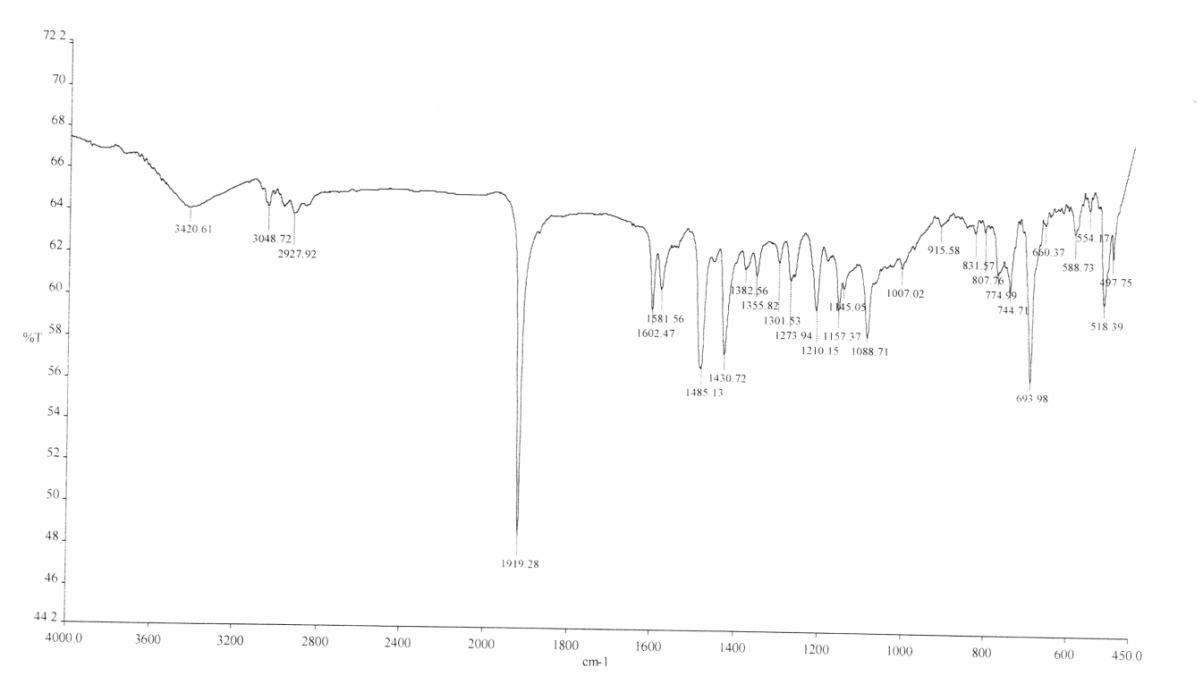


**Fig. S2:** IR spectrum of **2**(Cl)(EtDTC).


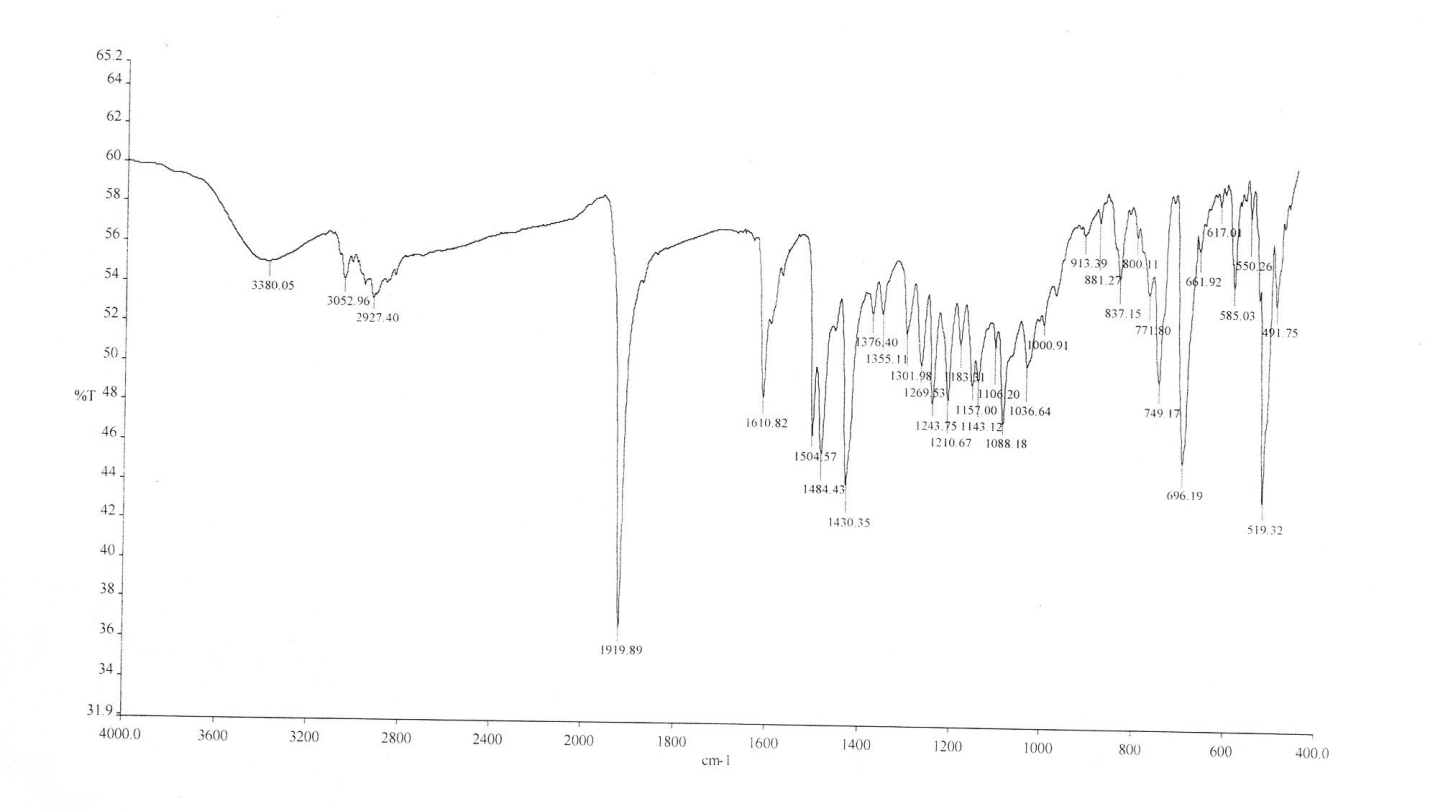


**Fig. S3:** IR spectrum of **2**(Cl)(PyrDTC).


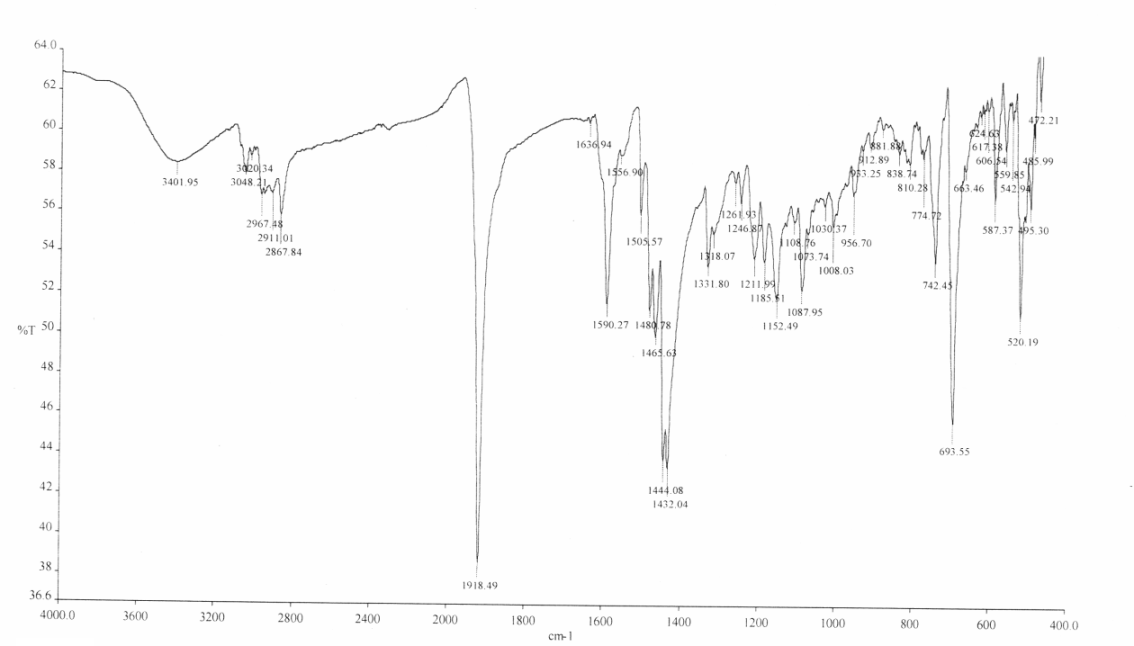


**Fig. S4:** IR spectrum of **2**(Me)(PyrDTC).


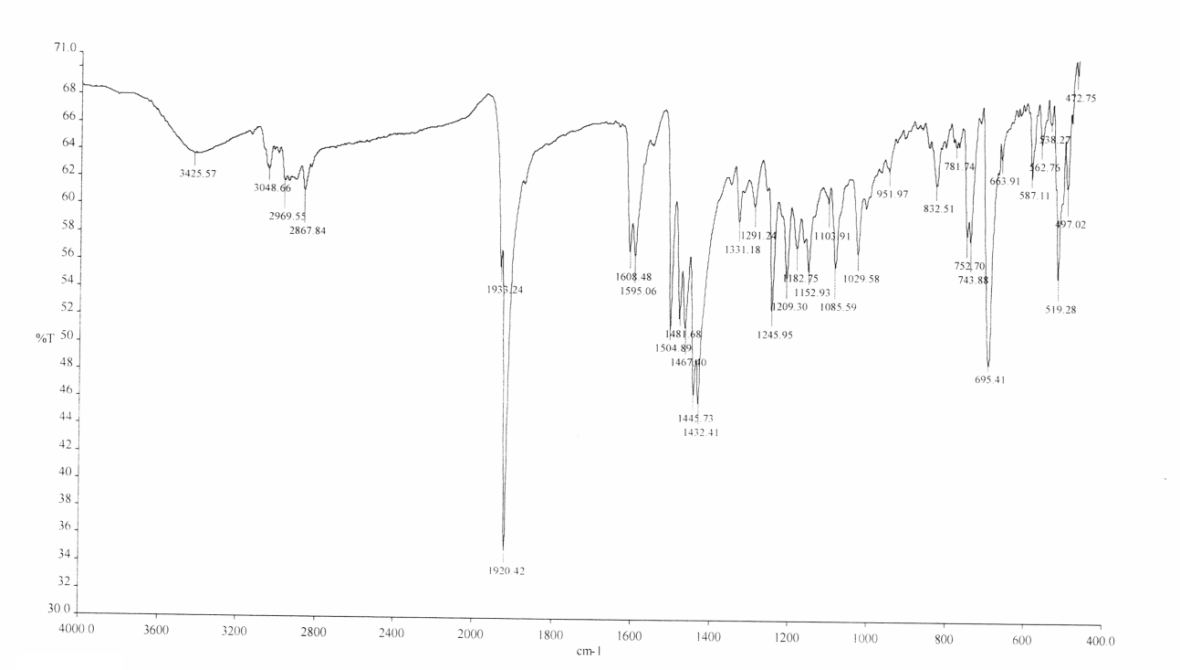


**Fig. S5:** IR spectrum of **2**(MeO)(PyrDTC).

**Fig. S6:** 1HNMR spectrum of **2**(Cl)(MeDTC).

**Fig. S7:** 1HNMR spectrum of **2**(Cl)(EtDTC).

**Fig. S8:** 1HNMR spectrum of **2**(Cl)(PyrDTC).


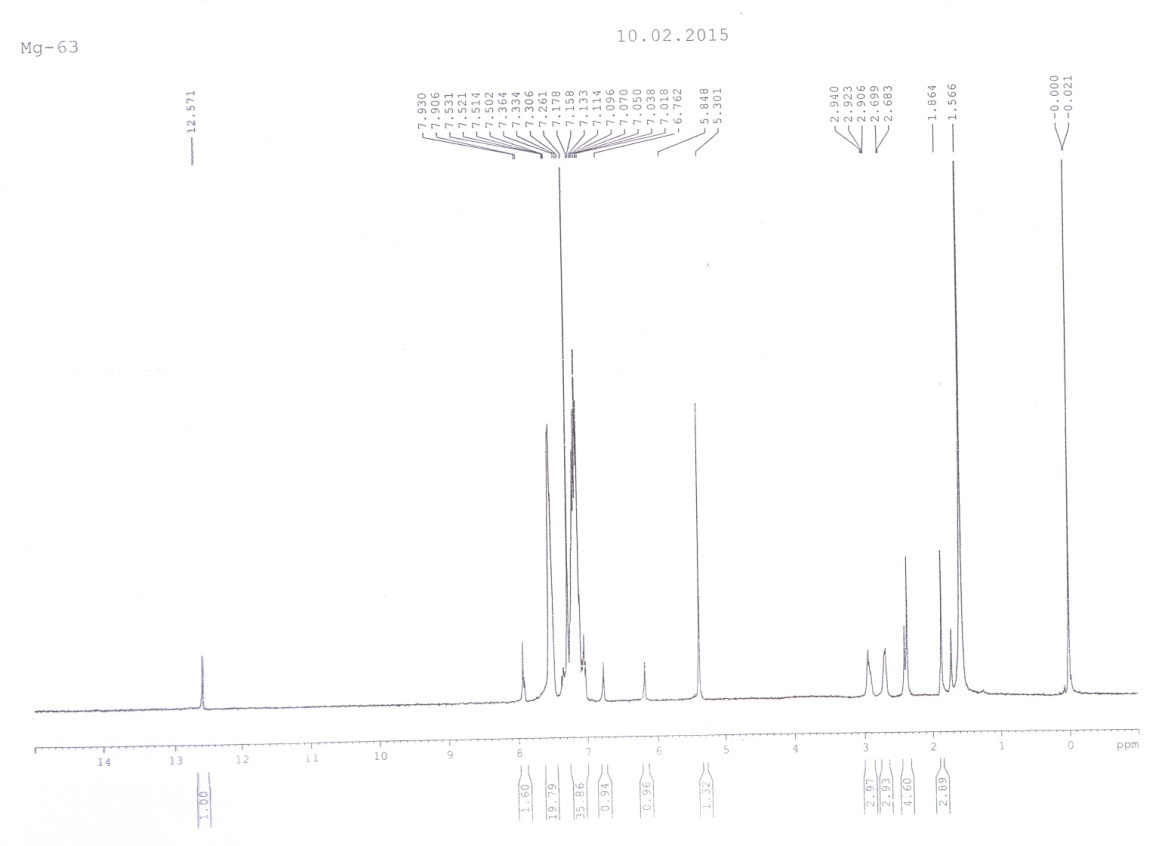


**Fig. S9:** 1HNMR spectrum of **2**(Me)(PyrDTC).

**Fig. S10:** 1HNMR spectrum of **2**(MeO)(PyrDTC).


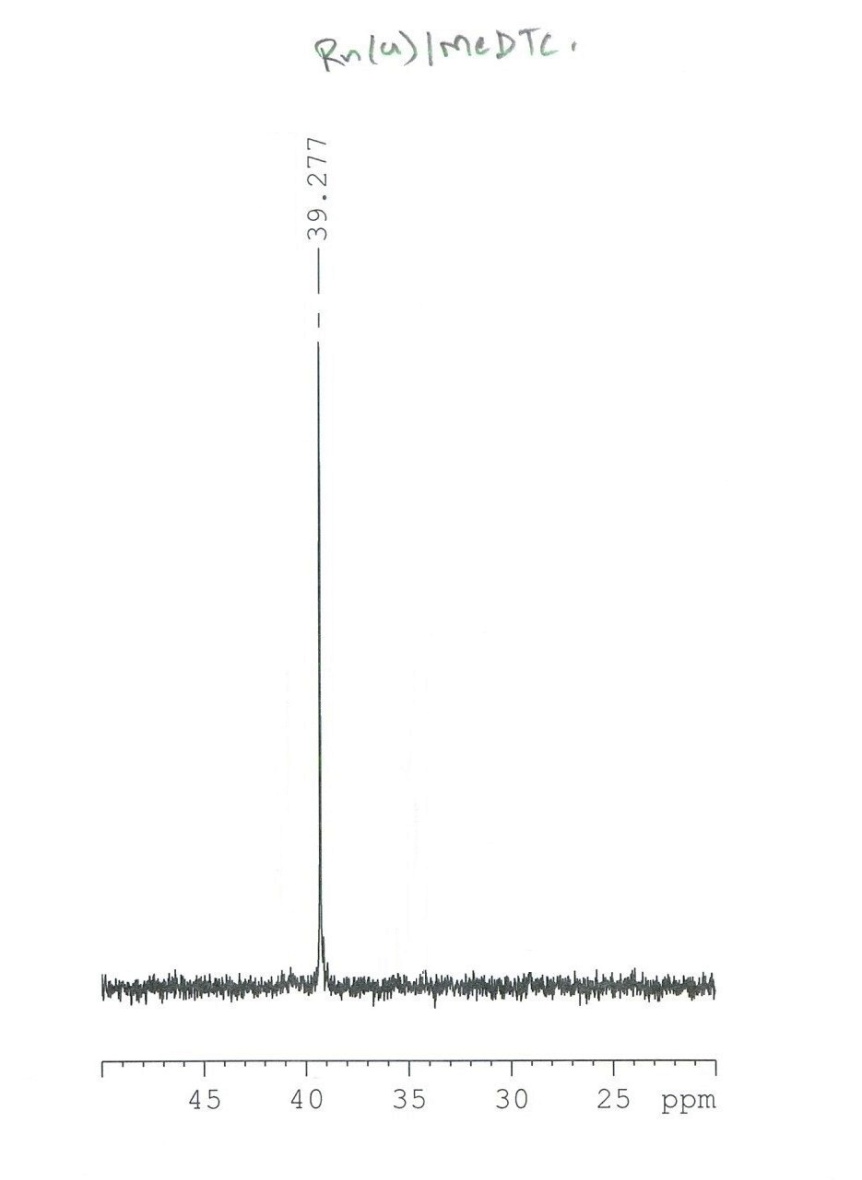


**Fig. S11: 3**1PNMR spectrum of **2**(Cl)(MeDTC).


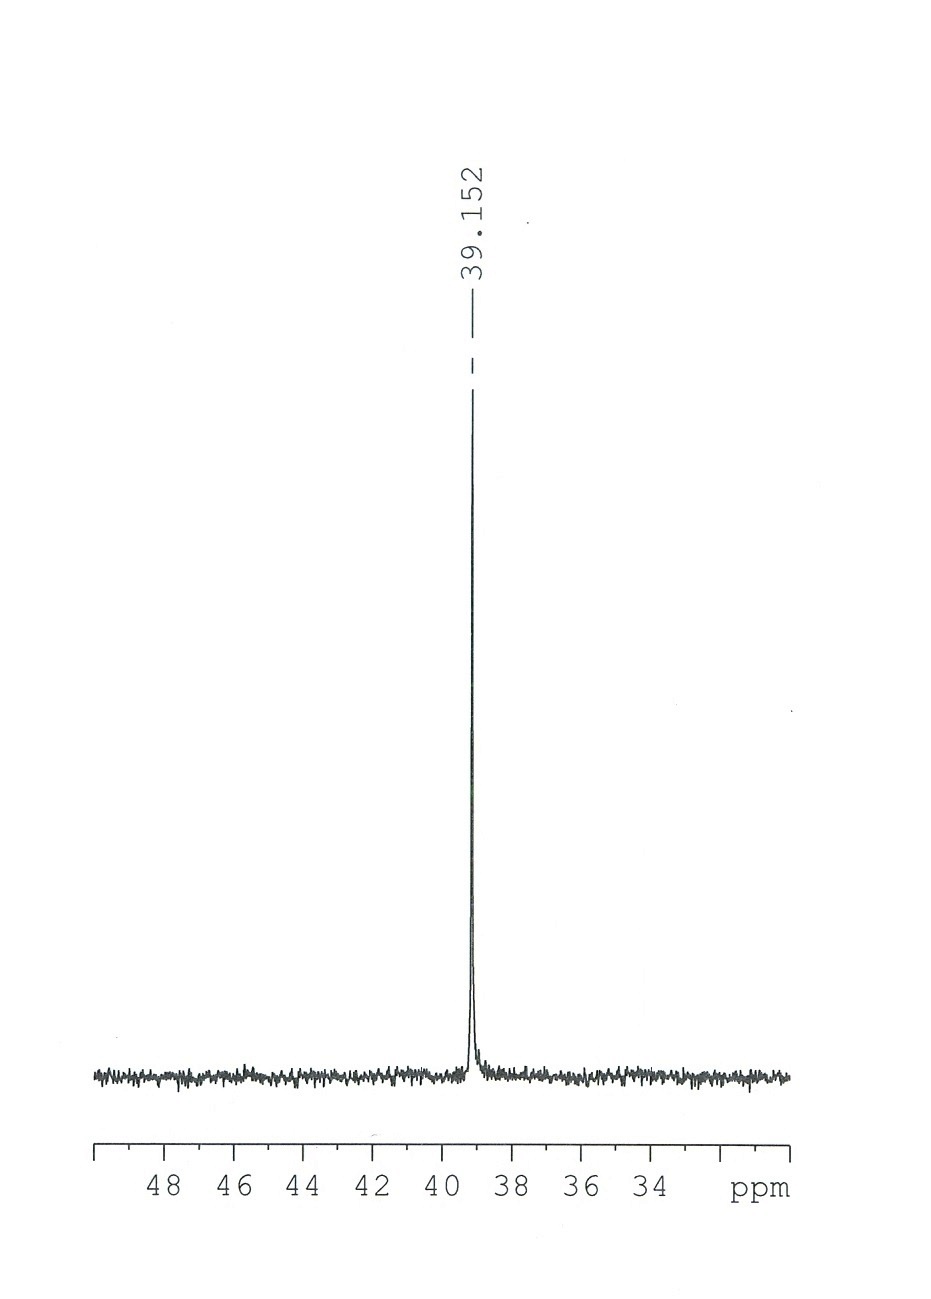


**Fig. S12: 3**1PNMR spectrum of **2**(Cl)(EtDTC).


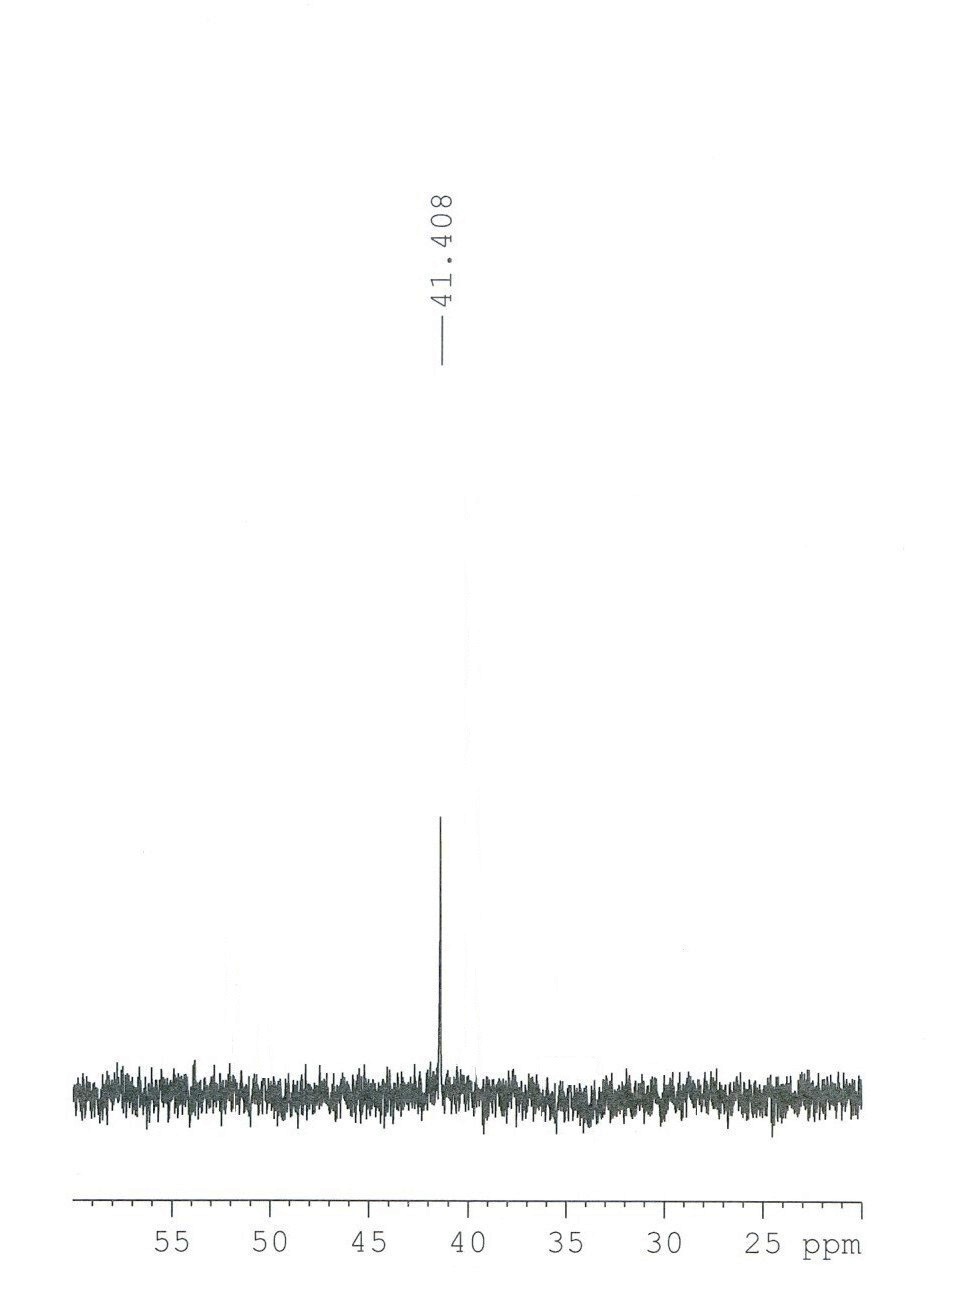


**Fig. S13: 3**1PNMR spectrum of **2**(Cl)(PyrDTC).


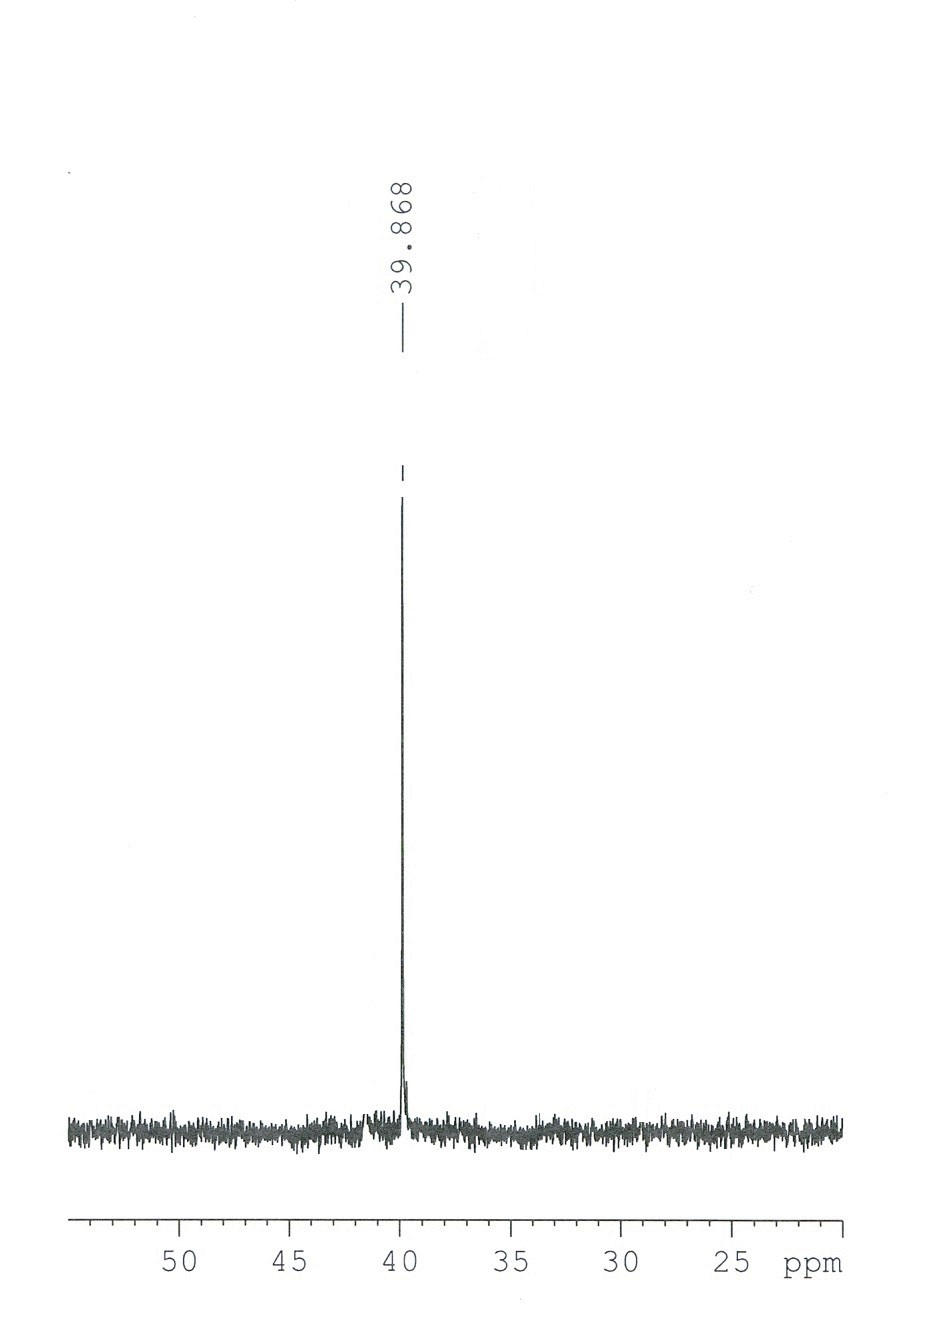


**Fig. S14: 3**1PNMR spectrum of **2**(Me)(PyrDTC).


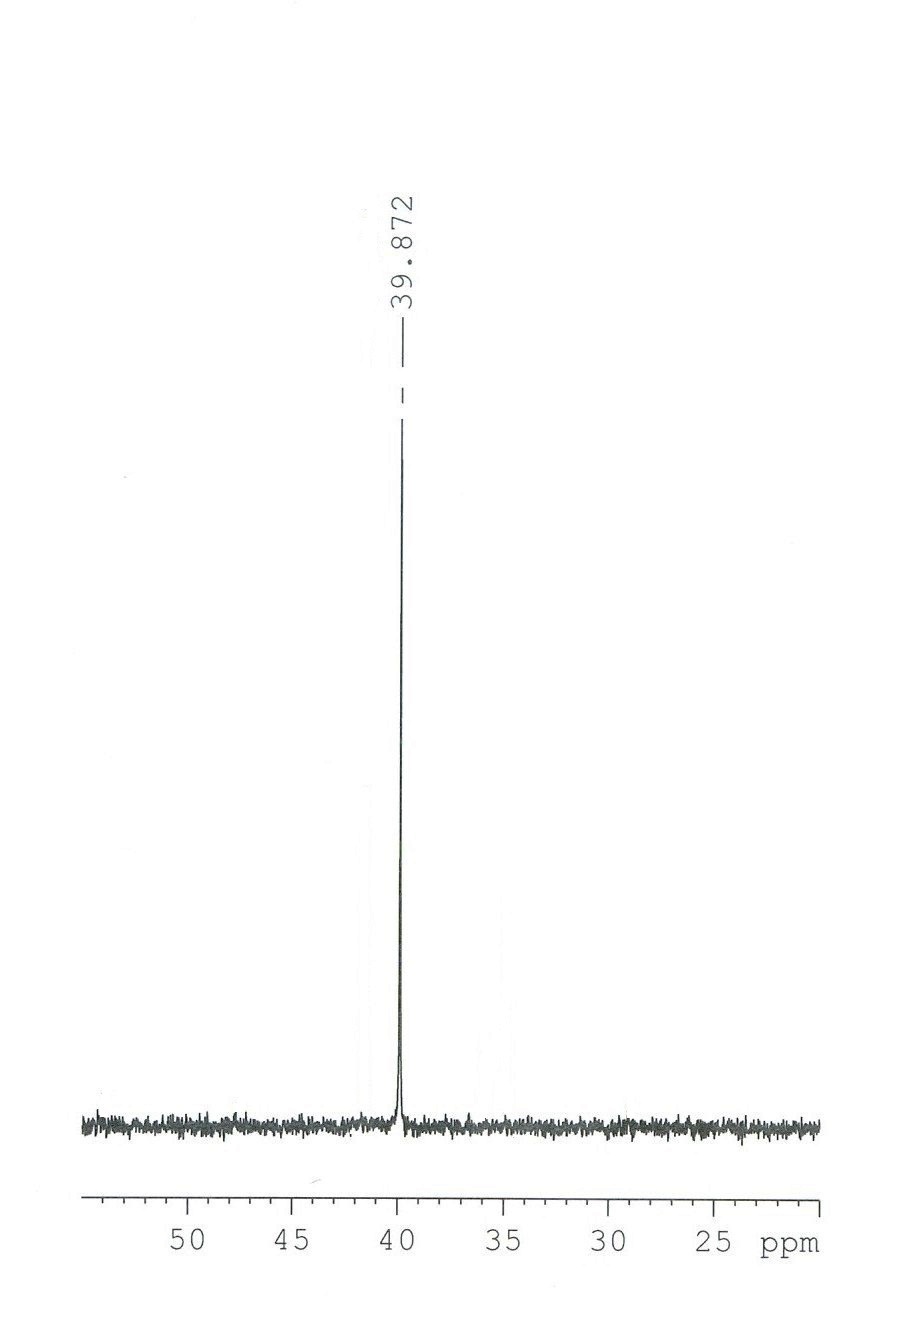


**Fig. S15: 3**1PNMR spectrum of **2**(MeO)(PyrDTC).


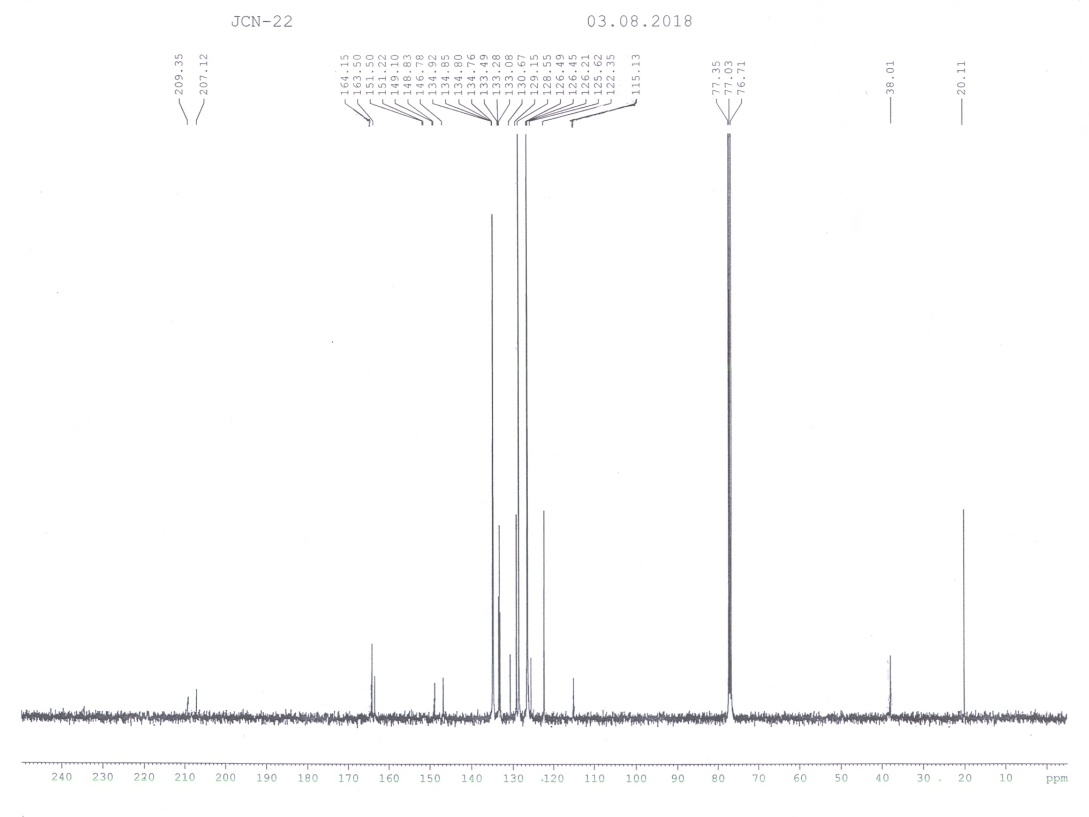


**Fig. S16: 13**CNMR spectrum of **2**(Cl)(MeDTC).


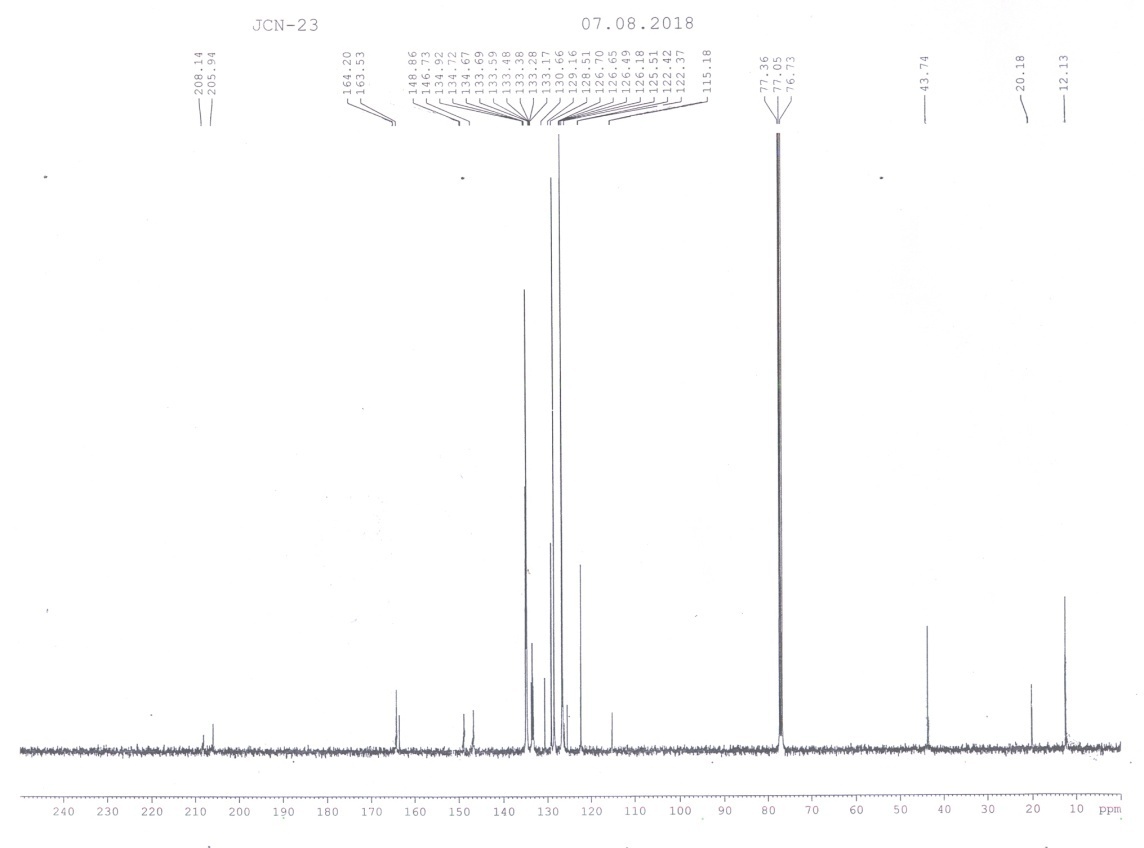


**Fig. S17: 13**CNMR spectrum of **2**(Cl)(EtDTC).


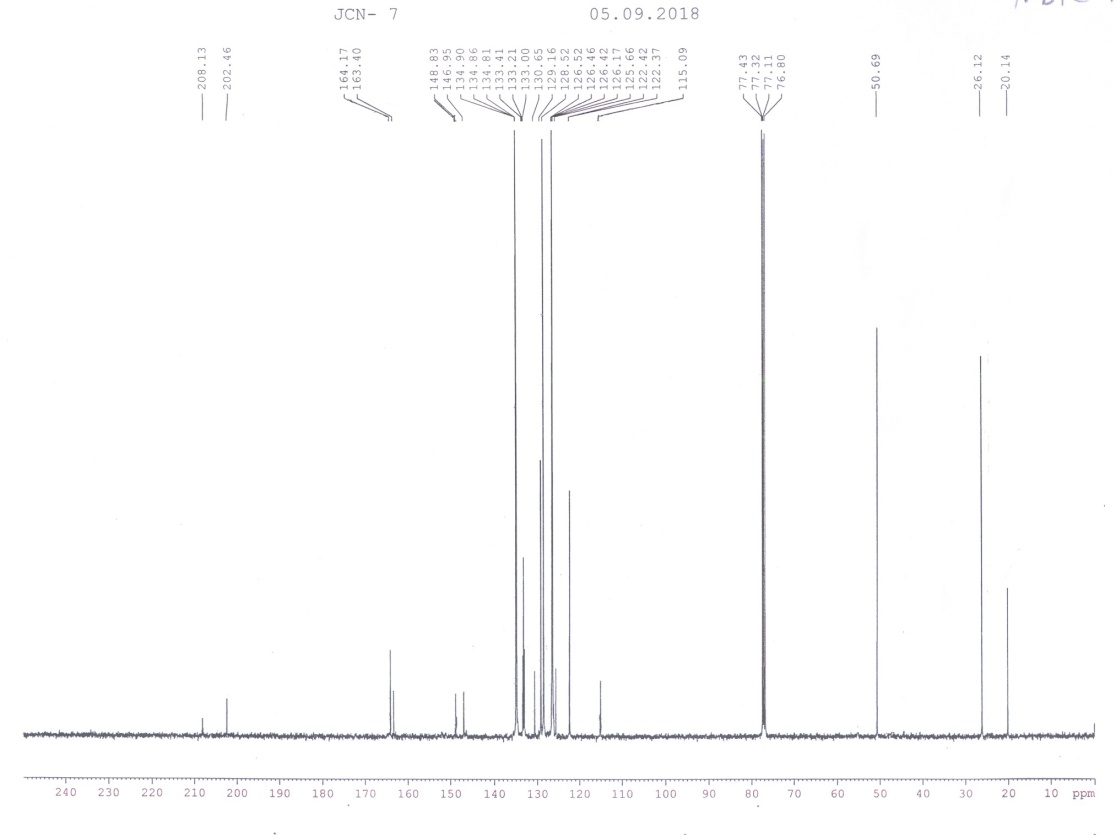


**Fig. S18: 13**CNMR spectrum of **2**(Cl)(PyrDTC).


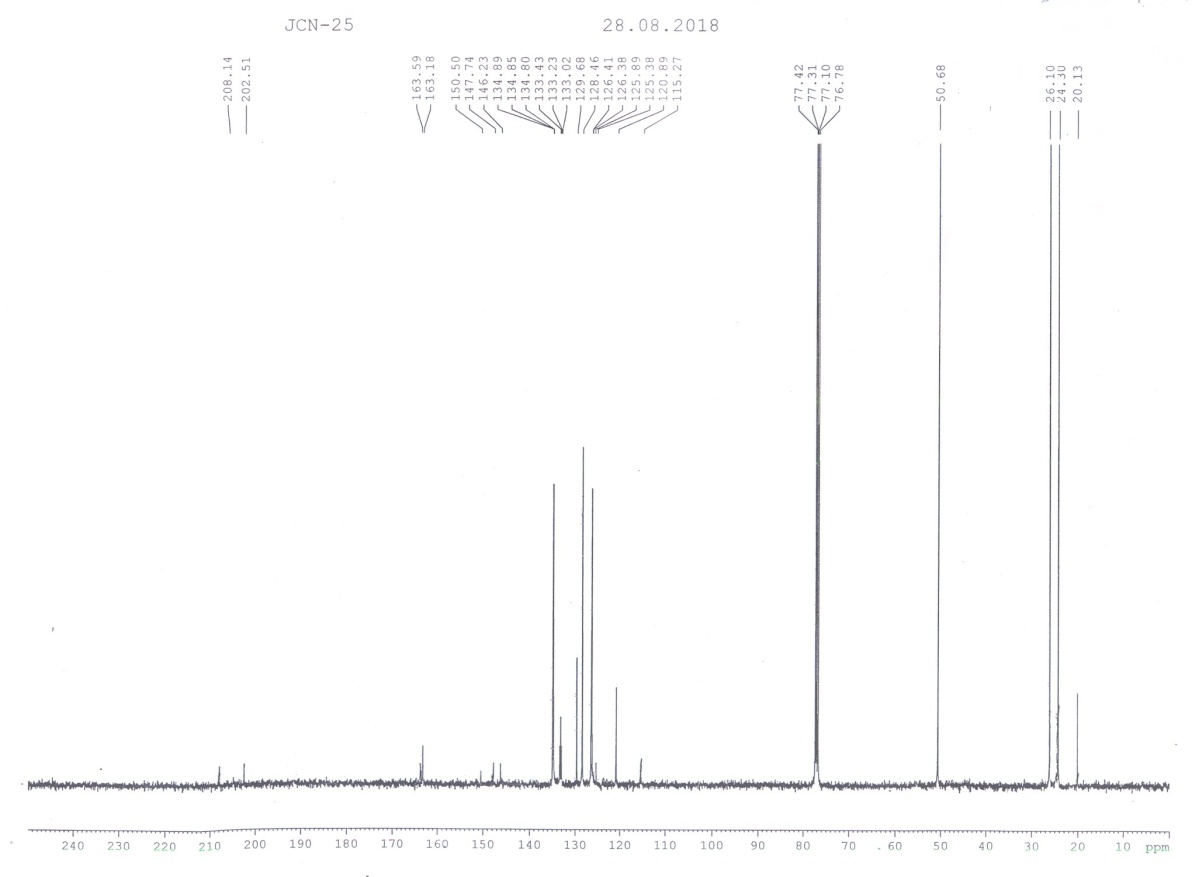


**Fig. S19: 13**CNMR spectrum of **2**(Me)(PyrDTC).


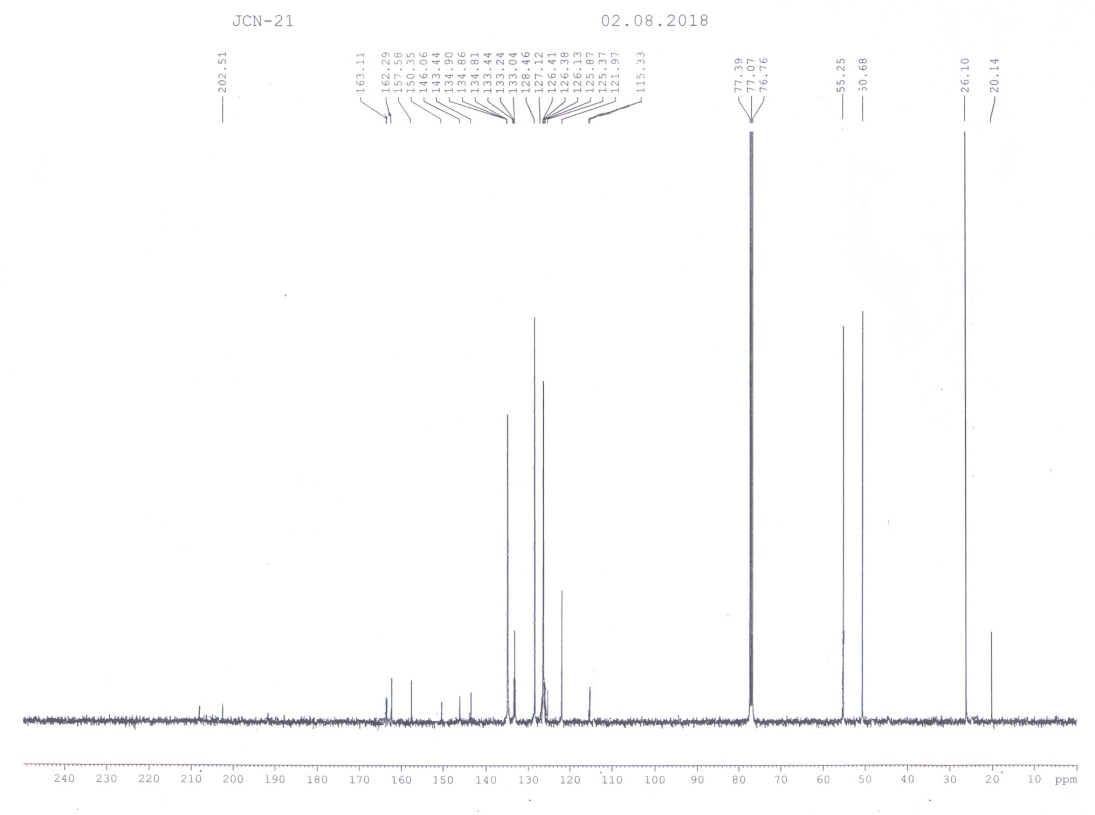


**Fig. S20: 13**CNMR spectrum of **2**(MeO)(PyrDTC).


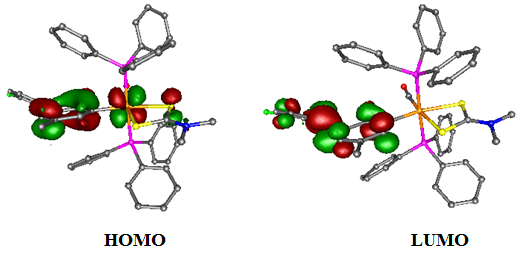


**Fig. S21:** Isodensity plot of frontier molecular orbitals of **2**(Cl)(MeDTC)with isodensity value 0.04.

**
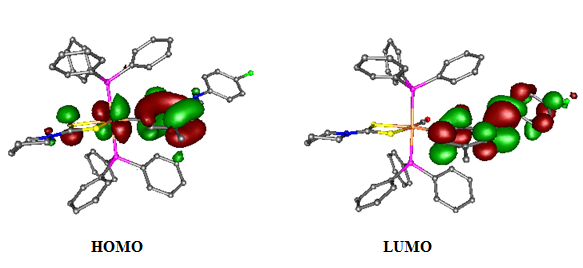
**

**Fig. S22:** Isodensity plot of frontier molecular orbitals of **2**(Cl)(PyrDTC)with isodensity value 0.04.


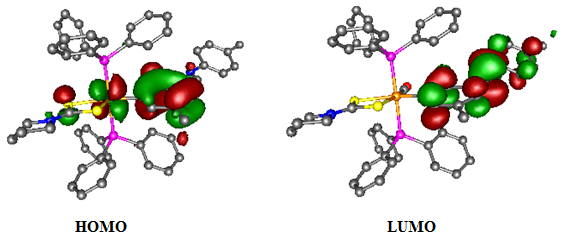


**Fig. S23:** Isodensity plot of frontier molecular orbitals of **2**(Me)(PyrDTC)with isodensity value 0.04.


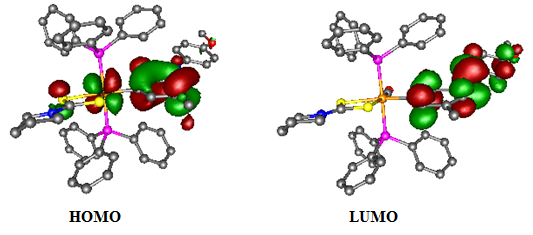


**Fig. S24:** Isodensity plot of frontier molecular orbitals of **2**(MeO)(PyrDTC)with isodensity value 0.04.

**Fig. S25:** Experimental and TDDFT calculated UV-vis absorption spectra of **2**(Cl)(MeDTC).


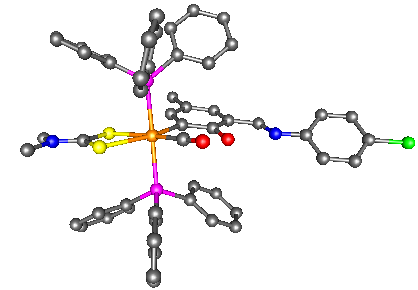


**Fig. S26:** Optimized structure of the oxidized species [**2**(Cl)(MeDTC)]+.

**
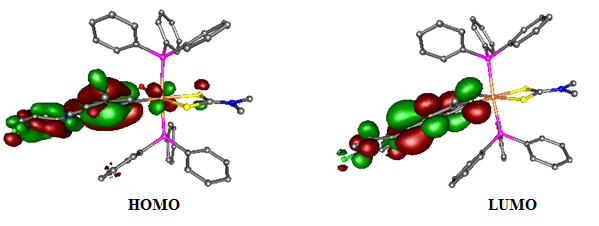
**

**Fig. S27:** Isodensity plot of frontier molecular orbitals of the oxidized species [**2**(Cl)(MeDTC)]+ with isodensity value 0.04.

**Table S1:** Frontier molecular orbital composition (%) in the ground state for **2**(Cl)(MeDTC).

| Orbital | Energy (eV) | Contribution (%) | | | | |
| --- | --- | --- | --- | --- | --- | --- |
| Ru | CO | RL | MeDTC | PPh3 |
| LUMO +5 | -0.7494 | 1.9 | 1.0 | 3.5 | 17.4 | 77.2 |
| LUMO +4 | -0.8199 | 3.4 | 2.5 | 2.8 | 15.1 | 76.9 |
| LUMO +3 | -0.8805 | 1.1 | 0.5 | 0.1 | 0.2 | 98.1 |
| LUMO +2 | -0.9320 | 0.5 | 0.0 | 1.8 | 0.3 | 97.4 |
| LUMO +1 | -1.1295 | 13.2 | 1.5 | 0.8 | 4.5 | 80.0 |
| LUMO | -1.7014 | 0.1 | 0.4 | 90.3 | 0.2 | 9.0 |
| HOMO | -4.9495 | 29.7 | 0.3 | 52.9 | 8.1 | 9.0 |
| HOMO –1 | -5.4529 | 14.8 | 0.4 | 55.0 | 20.7 | 9.1 |
| HOMO –2 | -5.6753 | 17.1 | 2.1 | 13.2 | 52.9 | 14.7 |
| HOMO –3 | -5.8356 | 23.1 | 2.8 | 28.7 | 27.0 | 18.4 |
| HOMO –4 | -5.9573 | 22.1 | 4.8 | 18.8 | 38.6 | 15.7 |
| HOMO –5 | -6.1891 | 34.1 | 3.6 | 10.5 | 35.8 | 16.0 |

**Table S2:** Frontier molecular orbital composition (%) in the ground state for **2**(Cl)(PyrDTC).

| Orbital | Energy (eV) | Contribution (%) | | | | |
| --- | --- | --- | --- | --- | --- | --- |
| Ru | CO | RL | PyrDTC | PPh3 |
| LUMO +5 | -0.7176 | 2.0 | 0.4 | 0.7 | 29.3 | 67.6 |
| LUMO +4 | -0.7952 | 3.1 | 0.5 | 1.4 | 19.2 | 75.8 |
| LUMO +3 | -0.8539 | 1.4 | 0.5 | 1.5 | 0.3 | 96.3 |
| LUMO +2 | -0.9009 | 0.5 | 0.0 | 4.0 | 0.6 | 94.9 |
| LUMO +1 | -1.1106 | 13.3 | 1.8 | 3.4 | 4.3 | 77.2 |
| LUMO | -1.6938 | 0.2 | 0.1 | 91.0 | 0.0 | 8.7 |
| HOMO | -4.9233 | 29.9 | 0.1 | 53.6 | 8.1 | 8.3 |
| HOMO –1 | -5.4266 | 14.3 | 0.5 | 57.0 | 20.8 | 7.4 |
| HOMO –2 | -5.6024 | 17.3 | 1.9 | 14.5 | 52.7 | 13.6 |
| HOMO –3 | -5.8201 | 20.3 | 2.4 | 38.5 | 26.9 | 11.9 |
| HOMO –4 | -5.9310 | 25.4 | 5.6 | 18.7 | 36.3 | 14.0 |
| HOMO –5 | -6.1595 | 33.8 | 2.5 | 11.4 | 39.5 | 12.8 |

**Table S3:** Frontier molecular orbital composition (%) in the ground state for **2**(Me)(PyrDTC).

| Orbital | Energy (eV) | Contribution (%) | | | | |
| --- | --- | --- | --- | --- | --- | --- |
| Ru | CO | RL | PyrDTC | PPh3 |
| LUMO +5 | -0.6456 | 2.0 | 0.7 | 2.7 | 22.1 | 72.5 |
| LUMO +4 | -0.7331 | 3.6 | 3.5 | 3.1 | 8.0 | 81.8 |
| LUMO +3 | -0.7994 | 1.2 | 5.1 | 4.2 | 0.2 | 89.3 |
| LUMO +2 | -0.8431 | 0.6 | 0.0 | 4.3 | 0.5 | 94.6 |
| LUMO +1 | -1.0403 | 12.7 | 1.5 | 1.1 | 4.7 | 80.0 |
| LUMO | -1.4943 | 0.1 | 0.1 | 92.1 | 0.0 | 7.7 |
| HOMO | -4.8205 | 27.5 | 0.0 | 56.8 | 7.1 | 8.6 |
| HOMO –1 | -5.2999 | 15.3 | 0.2 | 58.1 | 15.3 | 11.1 |
| HOMO –2 | -5.7176 | 14.8 | 2.1 | 11.2 | 57.0 | 14.9 |
| HOMO –3 | -5.7184 | 20.8 | 2.1 | 26.8 | 28.9 | 21.4 |
| HOMO –4 | -5.8480 | 27.2 | 6.0 | 15.3 | 35.1 | 16.4 |
| HOMO –5 | -6.0793 | 34.8 | 3.1 | 7.2 | 38.6 | 16.6 |

**Table S4:** Frontier molecular orbital composition (%) in the ground state for **2**(MeO)(PyrDTC).

| Orbital | Energy (eV) | Contribution (%) | | | | |
| --- | --- | --- | --- | --- | --- | --- |
| Ru | CO | PyrDTC | RL | PPh3 |
| LUMO +5 | -0.6371 | 2.2 | 0.6 | 20.6 | 7.6 | 69.0 |
| LUMO +4 | -0.7166 | 3.8 | 3.4 | 8.9 | 3.4 | 80.5 |
| LUMO +3 | -0.7847 | 1.2 | 4.1 | 0.2 | 5.7 | 88.8 |
| LUMO +2 | -0.8321 | 0.5 | 0.0 | 0.8 | 1.9 | 96.8 |
| LUMO +1 | -1.0256 | 12.6 | 1.3 | 4.8 | 1.9 | 79.4 |
| LUMO | -1.4652 | 0.1 | 0.0 | 0.2 | 92.3 | 7.4 |
| HOMO | -4.7867 | 25.2 | 0.0 | 6.2 | 56.6 | 12.0 |
| HOMO –1 | -5.1858 | 15.1 | 0.1 | 8.3 | 57.5 | 19.0 |
| HOMO –2 | -5.4832 | 12.1 | 1.9 | 60.2 | 9.7 | 16.1 |
| HOMO –3 | -5.6720 | 22.1 | 1.4 | 29.4 | 21.4 | 25.7 |
| HOMO –4 | -5.8288 | 30.4 | 6.9 | 32.8 | 14.8 | 15.1 |
| HOMO –5 | -6.0594 | 32.0 | 2.8 | 40.5 | 8.1 | 16.6 |

**Table S5:** Cartesian coordinates (Å) for DFT energy-minimized model of **2**(Cl)(MeDTC).

**Atom x y z**

Ru -3.216421 -0.035506 -0.165373

N 2.450696 0.056185 1.281275

N -6.891189 -0.338677 -2.534115

O -0.116346 -0.176876 1.123885

O -2.528641 -0.160595 2.781415

P -3.681521 2.315827 0.169043

P -2.847533 -2.430118 -0.394540

S -5.736099 -0.475870 -0.064985

S -4.206022 -0.005038 -2.489268

Cl 7.384743 -0.288281 4.657823

C -0.067787 0.286495 -0.144604

C -1.280871 0.427629 -0.890988

C -1.116642 0.917900 -2.203887

C 0.127425 1.252695 -2.814904

C 1.282987 1.100006 -2.053275

C 1.209963 0.628602 -0.712830

C 2.428913 0.497800 0.048585

C 3.631477 0.008544 2.037392

C 4.687803 0.944865 1.901312

C 5.837246 0.855590 2.700014

C 5.940781 -0.174081 3.650855

C 4.898862 -1.103490 3.820078

C 3.751160 -1.002067 3.023340

C 0.165009 1.775660 -4.236565

C -2.729250 -0.120923 1.624587

C -4.495788 2.772015 1.793063

C -5.205058 1.819249 2.553077

C -5.832806 2.184609 3.757481

C -5.758815 3.508593 4.220740

C -5.054016 4.467313 3.470729

C -4.426715 4.102468 2.268377

C -2.223962 3.479570 0.218679

C -1.143147 3.126866 1.058292

C -0.049024 3.994189 1.212318

C -0.011247 5.220613 0.524035

C -1.081718 5.578617 -0.312188

C -2.184803 4.716190 -0.460861

C -4.832366 3.106738 -1.060167

C -4.396796 3.327495 -2.388135

C -5.258738 3.903573 -3.336687

C -6.578024 4.240989 -2.981916

C -7.027534 4.000272 -1.672156

C -6.160450 3.438607 -0.716325

C -3.600337 -3.528914 0.918739

C -4.247707 -3.003071 2.053563

C -4.816800 -3.857197 3.017141

C -4.750946 -5.250146 2.855042

C -4.116414 -5.787987 1.719178

C -3.550961 -4.935511 0.758001

C -1.075732 -3.004646 -0.430469

C -0.534068 -3.838566 0.573058

C 0.809836 -4.247259 0.517608

C 1.636880 -3.827994 -0.538591

C 1.115713 -2.975845 -1.527171

C -0.224058 -2.555004 -1.467416

C -3.608561 -3.269012 -1.892226

C -2.883155 -3.622330 -3.048595

C -3.524263 -4.237853 -4.139474

C -4.901026 -4.511885 -4.093354

C -5.632742 -4.168688 -2.941702

C -4.994096 -3.553768 -1.851832

C -5.759228 -0.280093 -1.786807

C -8.190369 -0.652474 -1.945159

C -6.807600 -0.273829 -3.994273

H 0.852727 -0.216150 1.473346

H -2.010069 1.058636 -2.833367

H 2.268461 1.351043 -2.474235

H 3.373331 0.772762 -0.468484

H 4.594934 1.774404 1.187229

H 6.646153 1.590411 2.596949

H 4.987478 -1.895796 4.574008

H 2.927034 -1.717724 3.143991

H -0.368508 1.101944 -4.936290

H -0.319972 2.770084 -4.316989

H 1.203659 1.885637 -4.601014

H -5.269786 0.784791 2.200967

H -6.373845 1.424845 4.337419

H -6.240966 3.791976 5.166087

H -4.983065 5.504639 3.826007

H -3.870403 4.859911 1.701258

H -1.153181 2.173302 1.601169

H 0.780266 3.703950 1.871990

H 0.848020 5.895353 0.642581

H -1.068559 6.537191 -0.848746

H -3.020349 5.022046 -1.102837

H -3.373914 3.058388 -2.681207

H -4.898329 4.083264 -4.358722

H -7.252196 4.688921 -3.725037

H -8.055838 4.257877 -1.384568

H -6.520527 3.264177 0.304912

H -4.317935 -1.918599 2.188342

H -5.314435 -3.424697 3.895783

H -5.195629 -5.916468 3.606974

H -4.064086 -6.876819 1.578052

H -3.068007 -5.368446 -0.128221

H -1.159398 -4.172240 1.409171

H 1.209199 -4.898112 1.308104

H 2.685165 -4.152643 -0.583682

H 1.756385 -2.616946 -2.343918

H -0.592715 -1.845901 -2.218743

H -1.803697 -3.441361 -3.104804

H -2.935602 -4.512677 -5.025766

H -5.397910 -5.001701 -4.942437

H -6.706280 -4.395892 -2.881974

H -5.576454 -3.301470 -0.956612

H -8.454481 -1.720377 -2.096896

H -8.161472 -0.446209 -0.861956

H -8.968172 -0.019977 -2.412274

H -6.384162 -1.209232 -4.414349

H -7.822153 -0.119056 -4.399974

H -6.162618 0.570775 -4.299818

**Table S6:** Cartesian coordinates (Å) for DFT energy-minimized model of **2**(Cl)(EtDTC).

**Atom x y z**

Ru 2.604868 4.498352 2.821462

N -2.061273 2.711805 -0.221759

N 6.751473 5.470047 3.907088

O -0.325988 3.874634 1.294239

H -1.206443 3.634614 0.814805

O -0.115606 5.434037 3.767861

P 2.454976 2.748377 4.491271

P 2.684689 6.334857 1.228221

S 4.100442 5.843537 4.405873

S 5.042816 4.010772 2.367884

Cl -7.692273 2.517556 -2.252654

C 0.624217 3.033816 0.831738

C 1.960793 3.132041 1.334714

C 2.876724 2.221332 0.767573

H 3.927531 2.250198 1.096608

C 2.569467 1.243867 -0.224141

C 1.252732 1.167031 -0.669184

H 0.958738 0.420974 -1.423947

C 0.262546 2.050427 -0.156084

C -1.091894 1.936410 -0.640383

H -1.291328 1.130996 -1.379429

C -3.361364 2.637760 -0.744301

C -3.657226 2.236075 -2.072261

H -2.842596 1.982693 -2.763112

C -4.980506 2.195713 -2.534479

H -5.201781 1.892261 -3.565276

C -6.027525 2.564231 -1.671773

C -5.760494 2.987136 -0.357412

H -6.584598 3.284728 0.302173

C -4.434870 3.029923 0.093632

H -4.208451 3.362516 1.114782

C 3.650625 0.319731 -0.746284

H 4.520330 0.885112 -1.137637

H 4.037233 -0.349301 0.049906

H 3.275079 -0.324620 -1.563889

C 0.907584 5.042076 3.343340

C 1.708616 3.235151 6.138598

C 1.624206 4.583296 6.541909

H 1.985924 5.372049 5.874407

C 1.082989 4.925187 7.794707

H 1.021648 5.982449 8.087155

C 0.618332 3.923558 8.662677

H 0.193179 4.191853 9.639263

C 0.695136 2.574832 8.269752

H 0.328646 1.782871 8.936809

C 1.232166 2.234026 7.017762

H 1.272885 1.178271 6.719725

C 1.372692 1.277334 4.097476

C 0.060842 1.541310 3.644014

H -0.266530 2.573477 3.469445

C -0.837696 0.488240 3.409889

H -1.852037 0.714467 3.055155

C -0.440005 -0.845031 3.616741

H -1.142708 -1.667847 3.426579

C 0.861684 -1.116061 4.068801

H 1.183388 -2.152716 4.241050

C 1.762243 -0.062255 4.312645

H 2.768449 -0.294105 4.681963

C 4.054368 1.960559 5.020823

C 4.759596 1.142732 4.106863

H 4.354926 0.971236 3.101159

C 5.965560 0.527806 4.481419

H 6.490759 -0.118453 3.764583

C 6.501569 0.743989 5.764692

H 7.445942 0.264869 6.056451

C 5.823584 1.579819 6.667823

H 6.235457 1.759422 7.670283

C 4.606456 2.183106 6.300014

H 4.080201 2.821842 7.020144

C 2.250544 8.032527 1.883168

C 1.748452 8.227864 3.184237

H 1.606081 7.369900 3.848217

C 1.431598 9.519548 3.645554

H 1.037788 9.648609 4.662405

C 1.619479 10.633865 2.812460

H 1.372110 11.641813 3.172732

C 2.128679 10.452274 1.512818

H 2.283683 11.317382 0.853554

C 2.443415 9.163859 1.053262

H 2.842558 9.036109 0.038664

C 1.563332 6.192376 -0.252594

C 0.472750 7.070944 -0.442437

H 0.275550 7.868709 0.283337

C -0.376341 6.931764 -1.554198

H -1.221012 7.623388 -1.678453

C -0.150216 5.913860 -2.496505

H -0.811196 5.809610 -3.367923

C 0.916877 5.019355 -2.304765

H 1.091210 4.202861 -3.018812

C 1.757358 5.145034 -1.184712

H 2.547350 4.401656 -1.025958

C 4.355074 6.761499 0.487821

C 4.757220 6.400688 -0.814903

H 4.069389 5.869186 -1.482032

C 6.035613 6.743394 -1.293323

H 6.322830 6.457904 -2.314294

C 6.932330 7.454237 -0.479181

H 7.927276 7.727438 -0.855886

C 6.537048 7.827251 0.818588

H 7.221173 8.398790 1.461494

C 5.261950 7.485413 1.297756

H 4.962980 7.794169 2.307506

C 5.468306 5.134502 3.611770

C 7.051370 6.418025 4.996589

H 8.002821 6.919245 4.732100

H 6.258405 7.191403 4.991618

C 7.145691 5.782314 6.391145

H 7.320116 6.570853 7.148780

H 6.203700 5.264272 6.647460

H 7.974659 5.053785 6.457243

C 7.874175 4.888766 3.146970

H 7.513551 4.714533 2.115751

H 8.660395 5.667167 3.089601

C 8.441594 3.588662 3.733688

H 9.233205 3.194347 3.065944

H 8.888902 3.745741 4.732487

H 7.650569 2.821279 3.824222

**Table S7:** Cartesian coordinates (Å) for DFT energy-minimized model of **2**(Cl)(PyrDTC).

**Atom x y z**

Ru -1.234856 -0.017490 -0.526834

N 4.208697 1.599354 0.865600

N -5.579637 -0.430898 -0.506634

O 2.002767 0.829015 -0.228198

O 0.968165 -0.718818 -2.482463

P -1.085365 -2.299648 0.281403

P -1.395747 2.213783 -1.477468

S -3.281396 -0.728966 -1.901114

S -3.359658 0.408118 0.782707

Cl 10.092583 2.538891 0.264361

C 1.380987 0.958591 0.963977

C -0.012786 0.650746 1.069455

C -0.560846 0.817707 2.358361

C 0.148915 1.266637 3.510313

C 1.502019 1.558149 3.362985

C 2.142563 1.402899 2.102320

C 3.549200 1.703205 1.992386

C 5.591664 1.818752 0.781754

C 6.497109 1.544783 1.838769

C 7.873231 1.766379 1.683789

C 8.361334 2.263865 0.463100

C 7.487128 2.526727 -0.607133

C 6.115094 2.295201 -0.445945

C -0.560732 1.393299 4.843274

C 0.161190 -0.409923 -1.686732

C -0.700898 -3.602208 -1.007092

C -1.008879 -3.398386 -2.368264

C -0.752359 -4.401285 -3.320504

C -0.180529 -5.622407 -2.926140

C 0.132104 -5.835617 -1.571587

C -0.124873 -4.834747 -0.620306

C 0.256921 -2.682199 1.518836

C 1.569253 -2.273956 1.190135

C 2.646187 -2.593197 2.032502

C 2.429252 -3.314717 3.220628

C 1.127789 -3.723902 3.554374

C 0.047514 -3.415156 2.706317

C -2.618352 -3.002851 1.068867

C -3.050795 -2.510591 2.322870

C -4.213065 -3.018095 2.928467

C -4.976697 -4.005069 2.278454

C -4.569021 -4.481104 1.020343

C -3.396818 -3.985321 0.419765

C -1.483964 2.326540 -3.342504

C -1.298956 1.201992 -4.170010

C -1.378266 1.320049 -5.570580

C -1.648857 2.564702 -6.161444

C -1.843144 3.694256 -5.344173

C -1.764672 3.575639 -3.947805

C -0.010774 3.392067 -1.076044

C 0.863610 3.885230 -2.069966

C 1.908762 4.763614 -1.734086

C 2.099104 5.163059 -0.400136

C 1.249935 4.659252 0.599887

C 0.212576 3.770074 0.269421

C -2.941365 3.201696 -1.084833

C -2.984451 4.266200 -0.161523

C -4.188996 4.949141 0.090707

C -5.368580 4.581625 -0.576675

C -5.333209 3.527045 -1.507195

C -4.132691 2.843745 -1.759281

C -4.242017 -0.274752 -0.534578

C -6.357811 -1.078169 -1.581077

C -7.726762 -1.331215 -0.925595

C -6.424954 -0.016556 0.631218

C -7.855902 -0.177470 0.089903

H 2.984564 1.113589 -0.093882

H -1.627823 0.592804 2.514159

H 2.097705 1.904794 4.221513

H 4.059483 2.053904 2.914886

H 6.125786 1.121246 2.781050

H 8.569368 1.540052 2.500908

H 7.882210 2.904367 -1.558127

H 5.418818 2.493058 -1.271211

H -1.476349 2.012910 4.764457

H -0.875868 0.403440 5.232002

H 0.092407 1.855142 5.608068

H -1.457202 -2.451662 -2.686707

H -0.996762 -4.220006 -4.376078

H 0.027084 -6.402999 -3.670930

H 0.584855 -6.783846 -1.251056

H 0.133389 -5.013265 0.431111

H 1.757249 -1.707703 0.268680

H 3.658916 -2.268492 1.758795

H 3.272155 -3.558750 3.881605

H 0.945631 -4.293056 4.476462

H -0.958006 -3.762956 2.972796

H -2.470140 -1.734434 2.836582

H -4.523425 -2.636154 3.910124

H -5.884242 -4.402857 2.752847

H -5.156730 -5.252816 0.504060

H -3.083189 -4.373581 -0.556104

H -1.096669 0.223859 -3.723185

H -1.229738 0.430082 -6.196707

H -1.713478 2.656518 -7.254829

H -2.062136 4.672045 -5.795074

H -1.925901 4.462982 -3.321670

H 0.735753 3.582503 -3.115842

H 2.575537 5.136495 -2.523505

H 2.912970 5.853576 -0.138635

H 1.400510 4.943617 1.649848

H -0.405589 3.350399 1.072281

H -2.074909 4.590917 0.355514

H -4.196582 5.781447 0.808377

H -6.306360 5.120225 -0.382802

H -6.243874 3.239529 -2.050933

H -4.118167 2.026972 -2.493503

H -6.430286 -0.399434 -2.457540

H -5.844474 -1.998815 -1.916334

H -7.717246 -2.305497 -0.398815

H -8.547048 -1.356492 -1.666419

H -6.174607 1.018832 0.929564

H -6.225597 -0.677534 1.500521

H -8.175044 0.752083 -0.422069

H -8.586123 -0.383652 0.893117

**Table S8:** Cartesian coordinates (Å) for DFT energy-minimized model of **2**(Me)(PyrDTC).

**Atom x y z**

Ru -2.313665 -0.393683 0.607369

N 3.484470 -0.544521 1.368489

N -6.607906 -0.799206 1.290616

O 1.037098 -0.091484 0.697671

O -0.605808 0.983077 -1.479716

P -2.437688 -2.286815 -0.900972

P -2.217599 1.583396 2.014486

S -4.646924 0.309460 -0.207238

S -4.098884 -1.359581 2.119324

C 9.083537 0.610811 0.516576

C 0.634498 -1.047476 1.563791

C -0.760322 -1.342432 1.693689

C -1.069398 -2.353957 2.627807

C -0.124758 -3.061943 3.425676

C 1.221780 -2.742805 3.268349

C 1.626056 -1.746787 2.337769

C 3.033642 -1.452698 2.195193

C 4.858116 -0.312335 1.181481

C 5.852323 -1.313835 1.315530

C 7.202930 -1.010999 1.092828

C 7.619253 0.288594 0.727019

C 6.619749 1.275260 0.574057

C 5.265770 0.984237 0.787084

C -0.590595 -4.136664 4.386788

C -1.208523 0.438511 -0.630913

C -2.551005 -1.885691 -2.727065

C -2.991797 -0.624642 -3.178061

C -3.101678 -0.352831 -4.553838

C -2.771539 -1.338268 -5.498770

C -2.328534 -2.599347 -5.060211

C -2.217161 -2.870046 -3.686681

C -0.980757 -3.452576 -0.937336

C 0.300950 -2.877780 -1.091175

C 1.437671 -3.693462 -1.208829

C 1.315126 -5.094031 -1.163952

C 0.044765 -5.673406 -1.010846

C -1.098189 -4.858731 -0.904417

C -3.895416 -3.421691 -0.679848

C -3.975250 -4.238249 0.472375

C -5.074123 -5.091168 0.670482

C -6.124979 -5.120039 -0.264980

C -6.067385 -4.291539 -1.399013

C -4.959458 -3.448817 -1.606843

C -2.575041 3.221534 1.184621

C -2.752487 3.331518 -0.207993

C -3.030400 4.578076 -0.800387

C -3.138489 5.730542 -0.005907

C -2.969384 5.632279 1.388067

C -2.693919 4.388614 1.978141

C -0.595735 1.920517 2.865418

C 0.191747 3.048942 2.544408

C 1.424053 3.268644 3.183409

C 1.891887 2.365237 4.152963

C 1.127618 1.227529 4.462853

C -0.097840 0.996906 3.814910

C -3.483711 1.710797 3.393461

C -3.200652 1.455816 4.750893

C -4.211018 1.551821 5.725557

C -5.519238 1.909237 5.361299

C -5.809085 2.175269 4.010546

C -4.803262 2.075793 3.035979

C -5.284800 -0.640770 1.091834

C -7.648514 -0.265796 0.390718

C -8.916240 -1.021691 0.824543

C -7.175110 -1.582741 2.406803

C -8.681244 -1.279396 2.327199

H 2.066554 -0.030090 0.768154

H 9.586726 0.849259 1.476766

H 9.216691 1.485677 -0.147605

H 9.630315 -0.241851 0.069208

H -2.124240 -2.636728 2.775704

H 1.993699 -3.264021 3.855764

H 3.732328 -2.025969 2.841639

H 5.560317 -2.345010 1.557625

H 7.952937 -1.810258 1.190071

H 6.908831 2.292216 0.270748

H 4.497484 1.758039 0.658118

H -1.402022 -3.772787 5.049223

H -0.990377 -5.021059 3.848697

H 0.236020 -4.490501 5.031412

H -3.255175 0.149341 -2.450159

H -3.442565 0.637700 -4.884325

H -2.853511 -1.123645 -6.573548

H -2.060918 -3.376328 -5.789357

H -1.859183 -3.854713 -3.359901

H 0.418510 -1.786405 -1.120506

H 2.424913 -3.227010 -1.329345

H 2.206832 -5.730133 -1.249512

H -0.065523 -6.766809 -0.980064

H -2.083679 -5.330674 -0.805691

H -3.166639 -4.216997 1.214696

H -5.110616 -5.729628 1.564265

H -6.984033 -5.788311 -0.110602

H -6.882310 -4.307080 -2.136847

H -4.921695 -2.816647 -2.502578

H -2.680705 2.439685 -0.838087

H -3.166488 4.641104 -1.888690

H -3.358471 6.702721 -0.468247

H -3.056119 6.526932 2.020078

H -2.569798 4.323901 3.067519

H -0.149955 3.762917 1.785405

H 2.021295 4.151688 2.916988

H 2.854289 2.538015 4.653128

H 1.491370 0.498216 5.199170

H -0.648474 0.073268 4.031245

H -2.183770 1.200068 5.068762

H -3.964834 1.352695 6.777942

H -6.304950 1.992635 6.124914

H -6.823090 2.475728 3.711967

H -5.042563 2.294604 1.986922

H -7.744921 0.832638 0.531070

H -7.361401 -0.440451 -0.663795

H -8.987740 -1.981952 0.277703

H -9.837993 -0.446864 0.619311

H -6.708170 -1.273150 3.361323

H -6.951903 -2.659798 2.254562

H -8.916965 -0.369939 2.915426

H -9.296542 -2.105027 2.729154

**Table S9:** Cartesian coordinates (Å) for DFT energy-minimized model of **2**(MeO)(PyrDTC).

**Atom x y z**

Ru -2.779889 -0.279632 0.863771

N 3.036026 -0.081329 1.429380

N -7.050577 -0.373320 1.773212

O 0.569530 0.010273 0.700226

O -1.151007 0.070516 -1.664402

P -2.907737 -2.639498 0.333350

P -2.686688 2.115150 1.273148

S -5.142662 -0.011335 -0.110523

S -4.514638 -0.510413 2.692182

O 8.423787 0.624606 -0.013225

C 0.201416 -0.444829 1.918671

C -1.184617 -0.648326 2.210712

C -1.455313 -1.126977 3.510406

C -0.479389 -1.392133 4.513857

C 0.857645 -1.175170 4.189073

C 1.223389 -0.711370 2.896152

C 2.622378 -0.506136 2.596053

C 4.393405 0.076160 1.102502

C 5.466583 -0.572312 1.771898

C 6.789762 -0.365423 1.375426

C 7.088844 0.492918 0.292146

C 6.035012 1.130035 -0.396773

C 4.708077 0.911750 0.006932

C -0.901942 -1.911683 5.873263

C -1.720830 -0.056963 -0.644635

C -3.066001 -3.071346 -1.482562

C -3.540678 -2.134232 -2.423134

C -3.678657 -2.483898 -3.778766

C -3.344043 -3.777244 -4.213415

C -2.868667 -4.720199 -3.283940

C -2.729007 -4.370246 -1.930795

C -1.439135 -3.703620 0.772695

C -0.168344 -3.250170 0.353532

C 0.976025 -4.031976 0.579538

C 0.871217 -5.272180 1.234777

C -0.388781 -5.730573 1.653210

C -1.539306 -4.954414 1.418844

C -4.346892 -3.567857 1.061395

C -4.388338 -3.812475 2.454183

C -5.470041 -4.502434 3.027449

C -6.541915 -4.931675 2.222920

C -6.523606 -4.665779 0.842709

C -5.432492 -3.989898 0.264580

C -3.123876 3.230424 -0.164812

C -3.306664 2.731493 -1.469238

C -3.635080 3.596977 -2.529679

C -3.790245 4.973123 -2.298409

C -3.615383 5.482852 -0.997840

C -3.287362 4.619180 0.059083

C -1.042674 2.804318 1.811690

C -0.308224 3.695936 0.998114

C 0.941476 4.184529 1.417053

C 1.478295 3.792612 2.655222

C 0.764956 2.890741 3.462930

C -0.477269 2.387348 3.040128

C -3.895054 2.819555 2.522945

C -3.537464 3.222414 3.825815

C -4.506053 3.728898 4.712938

C -5.846536 3.845441 4.310899

C -6.210845 3.455748 3.008769

C -5.246660 2.946947 2.123720

C -5.734852 -0.310959 1.487817

C -8.120467 -0.278011 0.761841

C -9.369572 -0.762722 1.518247

C -7.579110 -0.592212 3.134884

C -9.089238 -0.343459 2.976173

C 8.777345 1.463589 -1.113751

H 1.600836 0.095874 0.708211

H -2.501147 -1.312397 3.803188

H 1.651554 -1.369662 4.927026

H 3.340303 -0.713415 3.417747

H 5.262061 -1.268613 2.596160

H 7.618385 -0.873901 1.884539

H 6.232049 1.789359 -1.250235

H 3.883989 1.402955 -0.526280

H -1.700610 -1.287370 6.321646

H -1.300915 -2.945084 5.808961

H -0.051618 -1.931991 6.581820

H -3.807834 -1.124843 -2.094616

H -4.043126 -1.735852 -4.495571

H -3.448010 -4.049172 -5.272927

H -2.597286 -5.732539 -3.612918

H -2.346752 -5.112999 -1.219447

H -0.065850 -2.281815 -0.152187

H 1.954962 -3.662491 0.246335

H 1.768945 -5.878746 1.417257

H -0.484726 -6.700729 2.159579

H -2.516663 -5.337875 1.735889

H -3.563419 -3.473620 3.094081

H -5.475655 -4.700644 4.108100

H -7.386554 -5.474059 2.670852

H -7.354812 -4.997663 0.204999

H -5.424380 -3.799314 -0.815835

H -3.196721 1.659716 -1.663765

H -3.773378 3.186428 -3.539099

H -4.049616 5.647635 -3.125931

H -3.738904 6.557321 -0.803095

H -3.157107 5.029327 1.069537

H -0.706270 4.011581 0.027177

H 1.497308 4.874448 0.766765

H 2.453849 4.176008 2.982389

H 1.181139 2.556227 4.422023

H -0.989697 1.643350 3.661500

H -2.494117 3.168515 4.157338

H -4.201510 4.042727 5.720582

H -6.600262 4.246891 5.002093

H -7.252463 3.558309 2.673575

H -5.544066 2.653737 1.108568

H -8.221902 0.772172 0.414926

H -7.863007 -0.894881 -0.119731

H -9.449261 -1.865504 1.446174

H -10.300838 -0.329787 1.110258

H -7.085081 0.095904 3.847078

H -7.353914 -1.630246 3.457634

H -9.313732 0.732449 3.116065

H -9.686355 -0.908657 3.714245

H 9.878599 1.426718 -1.178231

H 8.342764 1.094050 -2.066294

H 8.455966 2.513865 -0.948712

**Table S10:** Cartesian coordinates (Å) for DFT energy-minimized model of [**2**(Cl)(MeDTC)]+.

**Atom x y z**

Ru -3.147163 0.055169 -0.224187

N 2.354167 -0.155557 1.461203

N -6.659517 -0.477360 -2.702390

O -0.125343 -0.330901 1.140078

O -2.511159 0.119394 2.746186

P -3.760890 2.450648 0.061168

P -2.770129 -2.403316 -0.423942

S -5.584494 -0.447194 -0.186200

S -3.999419 -0.005847 -2.579214

Cl 6.751959 -1.433413 5.296806

C -0.035509 0.281693 -0.033710

C -1.226837 0.528444 -0.819017

C -1.001666 1.152376 -2.078066

C 0.257213 1.550446 -2.569619

C 1.391529 1.299055 -1.764739

C 1.275795 0.675589 -0.510172

C 2.455712 0.422900 0.293765

C 3.429729 -0.412057 2.329107

C 4.705757 0.196019 2.220798

C 5.723673 -0.117190 3.129047

C 5.476225 -1.043416 4.161895

C 4.211800 -1.645753 4.297691

C 3.197533 -1.322756 3.387953

C 0.397697 2.256627 -3.899050

C -2.708616 0.058387 1.597302

C -4.528667 2.872758 1.704299

C -5.291148 1.931342 2.428901

C -5.897220 2.287556 3.645957

C -5.746960 3.587751 4.157065

C -4.991146 4.532908 3.441487

C -4.385769 4.180672 2.224052

C -2.333222 3.637715 0.010178

C -1.232068 3.374938 0.857521

C -0.156169 4.274514 0.923566

C -0.159437 5.443365 0.139399

C -1.252787 5.713578 -0.699672

C -2.339252 4.819748 -0.760870

C -4.988281 3.112701 -1.158317

C -4.622786 3.282266 -2.515016

C -5.549978 3.782538 -3.445017

C -6.860070 4.098199 -3.038942

C -7.236016 3.914501 -1.697039

C -6.306844 3.426266 -0.760377

C -3.206555 -3.453291 1.045543

C -3.841478 -2.924786 2.186845

C -4.215417 -3.765143 3.252415

C -3.963361 -5.144461 3.186087

C -3.349879 -5.686585 2.040558

C -2.983477 -4.851410 0.973982

C -1.008126 -2.828164 -0.818930

C -0.195128 -3.574111 0.061783

C 1.139889 -3.863455 -0.274608

C 1.681440 -3.411489 -1.489648

C 0.887607 -2.642009 -2.358760

C -0.441798 -2.339085 -2.019787

C -3.775291 -3.308706 -1.717655

C -3.280014 -3.655041 -2.993350

C -4.088223 -4.351969 -3.909432

C -5.404287 -4.709508 -3.569173

C -5.904944 -4.373730 -2.298588

C -5.098124 -3.681612 -1.378890

C -5.568635 -0.326925 -1.930521

C -7.986742 -0.770567 -2.156161

C -6.529397 -0.426857 -4.164604

H 0.882997 -0.397950 1.528796

H -1.867368 1.365289 -2.722879

H 2.389838 1.596637 -2.119608

H 3.434513 0.725604 -0.126080

H 4.908078 0.940668 1.439816

H 6.707245 0.360921 3.049535

H 4.026684 -2.355883 5.112854

H 2.205773 -1.783024 3.482543

H -0.512379 2.146997 -4.517243

H 0.574085 3.342551 -3.757262

H 1.254119 1.864214 -4.481444

H -5.421329 0.914379 2.043455

H -6.482740 1.540704 4.198336

H -6.213091 3.862882 5.112061

H -4.865250 5.550984 3.833297

H -3.795139 4.929522 1.681791

H -1.219686 2.475430 1.486134

H 0.686257 4.062962 1.596010

H 0.683494 6.145922 0.192236

H -1.272918 6.630677 -1.303613

H -3.196290 5.062032 -1.401360

H -3.606161 3.039537 -2.847709

H -5.245601 3.928432 -4.490047

H -7.582738 4.491723 -3.766247

H -8.253692 4.164128 -1.369247

H -6.609136 3.302738 0.286777

H -4.066629 -1.855481 2.247848

H -4.708192 -3.334357 4.134137

H -4.254360 -5.799624 4.017955

H -3.163045 -6.766783 1.972243

H -2.529698 -5.292901 0.076959

H -0.595064 -3.928317 1.018476

H 1.757279 -4.447182 0.421645

H 2.719767 -3.649750 -1.754521

H 1.303497 -2.268477 -3.303515

H -1.031354 -1.701439 -2.690819

H -2.251489 -3.411429 -3.278719

H -3.677673 -4.626834 -4.890015

H -6.029224 -5.263549 -4.282706

H -6.920923 -4.672604 -2.008348

H -5.495024 -3.454923 -0.382027

H -8.289761 -1.802339 -2.421739

H -7.970105 -0.671624 -1.058797

H -8.722432 -0.056608 -2.571006

H -5.891058 -1.256359 -4.526737

H -7.532877 -0.517745 -4.610832

H -6.079284 0.533853 -4.478053

**Table S11:** Comparison of the crystal data of molecule A and B with the DFT optimized parameters.

| Bond lengths (Å) | Molecule A | Molecule B | DFT  Optimized |
| --- | --- | --- | --- |
| Ru1—S1 | 2.4904(18) | 2.4907(18) | 2.561 |
| Ru1—S2 | 2.4644(18) | 2.4609(18) | 2.527 |
| Ru1—P1 | 2.353(2) | 2.3593(19) | 2.423 |
| Ru1—P2 | 2.374(2) | 2.389(2) | 2.433 |
| Ru1—C(Aryl) | 2.126(7) | 2.102(7) | 2.119 |
| Ru1—C15 | 1.829(8) | 1.835(7) | 1.857 |
| C15—O2 | 1.172(8) | 1.175(8) | 1.175 |
| C7—N1 | 1.280(9) | 1.275(9) | 1.310 |
| Bond angles (°) |  |  |  |
| C2—Ru1—C15 | 96.2(3) | 96.3(3) | 96.21 |
| C2—Ru1—S2 | 90.89(18) | 91.43(19) | 92.46 |
| S2—Ru1—S1 | 70.14(6) | 70.32(6) | 69.45 |
| C15—Ru1—S1 | 102.9(2) | 102.1(2) | 101.89 |
| P1—Ru1—P2 | 175.40(7) | 179.23(7) | 176.82 |
| P2—Ru1—S2 | 89.03(6) | 88.47(6) | 89.80 |
| P1—Ru1—S2 | 92.95(6) | 92.08(6) | 92.52 |
| S1—C52—S2 | 112.8(4) | 113.4(4) | 113.65 |
